# Supplementary material for: Design and green synthesis of polymer inspired nanoparticles for the evaluation of their antimicrobial and antifilarial efficiency
Source: Royal Society of Chemistry journal article supplement (doi:10.1039/c4ra03732d), 2014-07-28
Supplement: c4ra03732d1.pdf [file c4ra03732d1.pdf]

1 **ESI:**

2 FTIR analysis

3 The interaction pattern between the AgNPs and stabilizers were analyzed by FTIR  
4 analysis. The FTIR spectra of chitosan and Chitosan-AgNP composite is shown in the figure  
5 below. Three intense peaks in the spectra of chitosan sample were observed at 3264, 2978 and  
6 1745  $\text{cm}^{-1}$ , which are probably due to O-H (moisture), O-H (chitosan) and C-O stretching  
7 respectively. The peak at 2978  $\text{cm}^{-1}$  disappeared in the spectra of Chitosan-AgNP composite.  
8 The disappearance of peak probably indicates the interaction between Chitosan and AgNPs.<sup>42</sup>  
9 Similar types of observations were obtained in other composites (BVA, BEG, BST) also.

10 **Figure:**

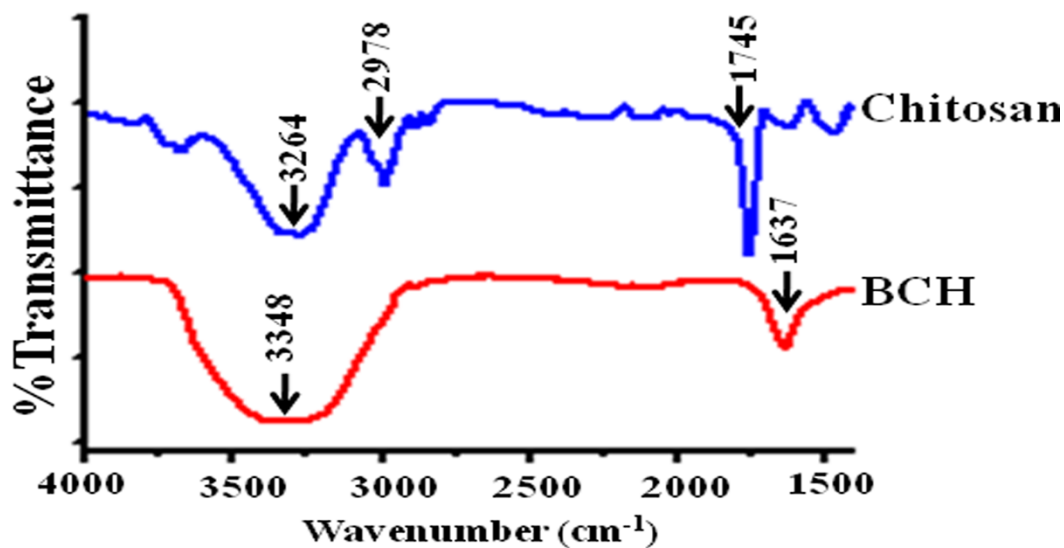

11

12 **Figure caption:**

13 IR spectra of Chitosan and BCH.

14

15
